1 **Diverse Arctic lake sediment microbiota shape**  
2 **methane emission temperature sensitivity**  
3

4 Joanne B. Emerson<sup>1+</sup>, Ruth K. Varner<sup>2,3\*</sup>, Martin Wik<sup>4</sup>, Donovan H. Parks<sup>5</sup>,  
5 Rebecca B. Neumann<sup>6</sup>, Joel E. Johnson<sup>2</sup>, Caitlin M. Singleton<sup>5,++</sup>, Ben J.  
6 Woodcroft<sup>5</sup>, Rodney Tollerson II<sup>1</sup>, Akosua Owusu-Domney<sup>7+++</sup>, Morgan  
7 Binder<sup>7++++</sup>, Nancy L. Freitas<sup>7,+++++</sup>, Patrick M. Crill<sup>4</sup>, Scott R. Saleska<sup>8</sup>,  
8 Gene W. Tyson<sup>5</sup>, and Virginia I. Rich<sup>1\*</sup>  
9

10 <sup>1</sup> Department of Microbiology, The Ohio State University, 496 W 12<sup>th</sup> Ave, Columbus, OH 43210,  
11 USA.

12 <sup>2</sup> Department of Earth Sciences, University of New Hampshire, 56 College Road, Durham, NH  
13 03824, USA

14 <sup>3</sup> Earth Systems Research Center, Institute for the Study of Earth, Oceans and Space,  
15 University of New Hampshire, 8 College Road, Durham, NH 03824, USA

16 <sup>4</sup> Department of Geological Sciences, Stockholm University, Stockholm 106 91, Sweden

17 <sup>5</sup> Australian Centre for Ecogenomics, School of Chemistry and Molecular Biosciences, University  
18 of Queensland, Brisbane 4072, Australia

19 <sup>6</sup> Civil & Environmental Engineering, University of Washington, 201 More Hall, Box 352700,  
20 Seattle, WA 98195-2700

21 <sup>7</sup> Department of Environmental Science, University of Arizona, AZ 85721, USA

22 <sup>8</sup> Department of Ecology and Evolutionary Biology, University of Arizona, Tucson, AZ 85721, USA  
23

24 <sup>+</sup>Current address: Department of Plant Pathology, University of California, Davis, One Shields  
25 Ave, Davis, CA 95616 USA

26 <sup>++</sup>Current address: Center for Microbial Communities, Department of Chemistry and Bioscience,  
27 Aalborg University, Aalborg 9220, Denmark

28 <sup>+++</sup> Current address: Parkland Hospital, 5200 Harry Hines Blvd., Dallas, TX 75235

29 <sup>++++</sup> Current address: John C. Lincoln Health Network, 34975 N North Valley Pkwy Ste 100,  
30 Phoenix, AZ 85086

31 <sup>+++++</sup>Current address: Energy and Resources Group, University of California, Berkeley  
32

33 \*Correspondence to: [ruth.varner@unh.edu](mailto:ruth.varner@unh.edu), [rich.270@osu.edu](mailto:rich.270@osu.edu)  
34  
35  
36

37 **Abstract**

38 Northern post-glacial lakes are a significant and increasing source of  
39 atmospheric carbon (C), largely through ebullition (bubbling) of microbially-  
40 produced methane (CH<sub>4</sub>) from the sediments<sup>1</sup>. Ebullitive CH<sub>4</sub> flux correlates  
41 strongly with temperature, suggesting that solar radiation is the primary driver of  
42 these CH<sub>4</sub> emissions<sup>2</sup>. However, here we show that the slope of the temperature-  
43 CH<sub>4</sub> flux relationship differs spatially, both within and among lakes.  
44 Hypothesizing that differences in microbiota could explain this heterogeneity, we

45 compared site-specific CH<sub>4</sub> emissions with underlying sediment microbial  
46 (metagenomic and amplicon), isotopic, and geochemical data across two post-  
47 glacial lakes in Northern Sweden. The temperature-associated increase in CH<sub>4</sub>  
48 emissions was greater in lake middles—where methanogens were more  
49 abundant—than edges, and sediment microbial communities were distinct  
50 between lake edges and middles. Although CH<sub>4</sub> emissions projections are  
51 typically driven by abiotic factors<sup>1</sup>, regression modeling revealed that microbial  
52 abundances, including those of CH<sub>4</sub>-cycling microorganisms and syntrophs that  
53 generate H<sub>2</sub> for methanogenesis, can be useful predictors of porewater CH<sub>4</sub>  
54 concentrations. Our results suggest that deeper lake regions, which currently  
55 emit less CH<sub>4</sub> than shallower edges, could add substantially to overall CH<sub>4</sub>  
56 emissions in a warmer Arctic with longer ice-free seasons and that future CH<sub>4</sub>  
57 emission predictions from northern lakes may be improved by accounting for  
58 spatial variations in sediment microbiota.

59

## 60 **Main text**

61 At high latitudes, lakes and ponds are recognized as a large and  
62 understudied source of methane (CH<sub>4</sub>)<sup>1,3,4</sup>, a radiatively important trace gas.  
63 Post-glacial lakes (formed by glaciers and receding ice sheets, leaving mineral-  
64 rich sediments) represent the largest lake area at high latitudes<sup>5</sup>. Because of  
65 their areal extent, these lakes contribute to approximately two-thirds of the  
66 model-predicted natural CH<sub>4</sub> emissions above 50° N latitude<sup>1</sup>. Their  
67 geochemistry and emissions are distinct from thermokarst lakes formed by  
68 permafrost thaw<sup>6</sup>. With warming, permafrost thaw, and predicted increased

69 precipitation, northern lakes are expected to receive more terrestrially-derived  
70 carbon, likely increasing their carbon dioxide (CO<sub>2</sub>) and CH<sub>4</sub> emissions<sup>7,8</sup>.

71 Ebullition commonly accounts for > 50%, sometimes > 90% of the CH<sub>4</sub> flux  
72 from post-glacial lakes, with the remainder primarily attributed to diffusion-limited  
73 hydrodynamic flux<sup>9,10</sup>. Ebullition moves CH<sub>4</sub> rapidly from sediments directly to the  
74 atmosphere, typically bypassing microbial CH<sub>4</sub> oxidation in the water column<sup>11</sup>.  
75 Incoming short-wave radiation and sediment temperature have been identified as  
76 strong predictors of ebullitive CH<sub>4</sub> emission from sub-arctic post-glacial lakes on  
77 an annual basis, with higher temperature increasing emissions during the ice-free  
78 season<sup>2,12</sup>. However, the extent and drivers of spatial variability in this  
79 temperature response, particularly within lakes, are poorly understood.

80 To address this knowledge gap, we analyzed CH<sub>4</sub> emissions over a six-  
81 year period and collected underlying sediment cores in July 2012 from the littoral  
82 (“edge”) and pelagic (“middle”) locations of two shallow post-glacial lakes,  
83 Mellersta Harrsjön and Inre Harrsjön, (Figure S1, Supplementary Table 1). These  
84 lakes are part of the Stordalen Mire complex, a hydrologically interconnected,  
85 discontinuous permafrost ecosystem encompassing post-glacial lakes and a  
86 mosaic palsa/wetland in approximately equal portions<sup>13</sup>. The lakes contribute  
87 ~55% of the total ecosystem CH<sub>4</sub> loss<sup>2</sup> and are model sites for studying ebullitive  
88 emissions, which were collected at lake surfaces for the six summers from 2009-  
89 2014<sup>12,14</sup> every 1-3 days<sup>9</sup>. Here, we linked site-specific (lake edge vs. middle)  
90 CH<sub>4</sub> emissions to analyses of the microbiota and biogeochemistry in the  
91 underlying sediments.

92 Previous work has shown that annual ebullitive emissions are consistently  
93 higher from these lakes' shallow littoral zones than their deeper pelagic zones<sup>9,15</sup>,  
94 as expected, since the shallow sediments experience higher temperatures for  
95 longer periods and also receive more substrate input from aquatic vegetation<sup>16</sup>.  
96 However, assessing the temperature *sensitivity* of ebullition for the two lake  
97 zones in this study revealed a previously unnoticed significant difference, with  
98 ~5-fold higher temperature sensitivity in lake middles relative to edges (Figure 1,  
99 Supplementary Table 2). Predicted future emissions from post-glacial subarctic  
100 lakes are based on current measurements of temperature responsiveness<sup>1</sup>,  
101 which are dominated by ebullitive flux data from shallow lake edges because  
102 those locations currently experience a longer period of sufficient warmth for  
103 seasonal emissions than lake middles (~3 months relative to ~1 month)<sup>2</sup>. If, as  
104 suggested here by our spatially resolved emissions data, temperature  
105 responsiveness is substantively higher in the deeper sediments, then, as deeper  
106 regions warm and remain heated for longer before cooling off in the fall, future  
107 lake emissions would be greater than currently predicted. Thus, accurate CH<sub>4</sub>  
108 emission predictions rely on understanding the spatial heterogeneity and  
109 underlying causes of this temperature responsiveness.

110 Ebullition is controlled by CH<sub>4</sub> production (which is in turn driven by redox,  
111 substrates, temperature, and microbiota), consumption (driven by redox and  
112 microbiota)<sup>17-19</sup>, and the physics of bubble formation and escape (determined by  
113 sediment texture and overlying hydrostatic pressure, which is largely controlled  
114 by atmospheric conditions)<sup>2,15</sup>. Therefore, the edge-to-middle difference in

115 temperature responsiveness of CH<sub>4</sub> ebullition could be partly due to differences  
116 in physicochemical characteristics (e.g., sediment texture, pressure, and redox),  
117 substrates (e.g., organic carbon), and/or microbiota (abundance, composition,  
118 and/or activity)<sup>20</sup>. Although differences in sediment texture were observed  
119 between the lake edge and middle in Mellersta Harrsjön, these differences were  
120 not consistent between lakes (Figure S2, Supplementary Table 3). Our previous  
121 work has shown higher and more variable ebullition rates during periods of  
122 dropping atmospheric pressure, but there were no differences in edge versus  
123 middle locations<sup>9</sup>. In terms of redox, we expect concentrations of terminal  
124 electron acceptors to be low, as the likely source would be runoff<sup>21</sup>, and total  
125 sulfur and nitrogen did not correlate with ebullition rates by lake or location<sup>15</sup>. In  
126 terms of measured substrates, carbon:nitrogen (C:N) ratios and bulk <sup>13</sup>C<sub>TOC</sub>  
127 (indicative of vegetation composition) did not vary from edges to middles. Total  
128 organic carbon (TOC) varied by lake, with similar concentrations observed  
129 between lake edge and middle in Mellersta and appreciably higher TOC in  
130 middle sediments in Inre Harrsjön. Carbon quality, as assessed by visual  
131 comparisons of organic matter composition, revealed coarse, less decomposed  
132 detritus gyttja (organic-rich, peat-derived mud) in the edge sediments of both  
133 lakes, while middle sediments were characterized by fine-grained, generally  
134 more decomposed detritus gyttja<sup>15</sup>. Thus, higher temperature responsiveness  
135 occurred where there was lower potential substrate quality, suggesting that  
136 substrate differences do not readily explain differences in CH<sub>4</sub> emission

137 responses to temperature in edge versus middle lake locations, although more  
138 detailed substrate analyses could further evaluate this in future.

139         Next, we sought to characterize differences in microbiota that could  
140 contribute to the observed temperature response differences in CH<sub>4</sub> emissions.  
141 We used a 16S rRNA gene amplicon sequencing approach to characterize  
142 microbial community composition from the edge and middle cores from each lake  
143 (Figure 2A-B, Supplementary Table 4). Although microbial community  
144 composition differed most significantly by depth within the sediment (Figure S3,  
145 Supplementary Table 5), as is typical for aquatic sediments<sup>22</sup>, significant  
146 differences between lake edges and middles (Figure 2C, PERMANOVA  $p =$   
147 0.001) suggest that microbiota could contribute to the observed temperature  
148 sensitivity in CH<sub>4</sub> emissions. Indeed, methanogens (defined here as populations  
149 from known methanogenic clades<sup>23</sup>, Supplementary Table 4) were significantly  
150 more abundant in lake middles than edges (Figure 2D, ANOVA  $p = 0.0001$ ),  
151 while total microbial abundances correlated most strongly with depth and did not  
152 exhibit edge vs. middle differences (Figure S4, Supplementary Table 6). Aerobic  
153 methanotrophs, which are posited to have minimal impact on ebullitive loss due  
154 to rapid bubble movement through sediment<sup>11</sup>, were confined to the surface  
155 sediment layers as expected (Supplementary Table 7) and did not differ  
156 significantly in composition or relative abundance between edges and middles  
157 (ANOVA  $p = 0.76$ ). Anaerobic methanotroph abundances differed significantly  
158 between lake edges and middles (ANOVA  $p = 0.014$ , Supplementary Tables 7-8)  
159 and were approximately one order of magnitude higher in edge sediments.

160 Although this could suggest that increased anaerobic methane oxidation in the  
161 edge sediments could contribute to the observed differences in temperature  
162 sensitivity, these anaerobic methanotrophs comprised only 0.1% of the  
163 community on average (up to 0.6%, Supplementary Tables 4 and 7), and  
164 ebullition is expected to largely bypass methane oxidation.

165 To test the relevance of these community differences to their observable  
166 CH<sub>4</sub> production potential, we performed 48 *ex situ* anaerobic incubations of edge  
167 and middle sediments collected in 2012 (linked directly to our microbial and  
168 biogeochemical data) and 2013 (from the same four core locations)  
169 (Supplementary Table 9). These incubations at 5 and 22 °C confirmed that the  
170 lake-middle sediments had higher CH<sub>4</sub> production potentials than lake-edge  
171 sediments at both temperatures (Figure 3), paralleling their higher methanogen  
172 abundances and indicating that the lake-middle methanogens can remain  
173 metabolically active at higher temperatures, despite never yet experiencing them  
174 *in situ*.

175 In order to relate microbiota from discrete depths to *in situ* CH<sub>4</sub> ebullition,  
176 we partitioned ebullition to its likely source depths. We applied isotope and mass  
177 balance calculations to infer ebullitive loss (“fugitive CH<sub>4</sub>”) at each depth, based  
178 on stable carbon isotope values and porewater concentrations of CH<sub>4</sub> and  
179 dissolved inorganic carbon (DIC) (Supplementary Table 3). From this inferred  
180 ebullitive loss, total production at each depth interval was calculated and  
181 correlated with microbiota from the same depth. Mantel tests revealed a

182 significant correlation between microbial community composition and fugitive CH<sub>4</sub>  
183 ( $p = 0.016$ ) (Supplementary Table 5).

184 To more specifically investigate links between CH<sub>4</sub>-associated microbial  
185 functional guilds and CH<sub>4</sub> chemistry, we identified multiple known CH<sub>4</sub>-cycling  
186 clades in the 16S rRNA gene amplicon data and applied targeted metagenomic  
187 sequencing to a subset of samples to examine diagnostic genes for CH<sub>4</sub> cycling  
188 (and to assemble genomes for metabolic pathway reconstructions, discussed  
189 further below). From the metagenomes, we recovered 5,470 examples  
190 (sequencing reads) of 28 phylogenetically diverse functional genes indicative of  
191 CH<sub>4</sub> production (*mcrA*) and consumption (*pmoA*) potential (Figure S5,  
192 Supplementary Table 10). We used partial least squares regressions (PLSR) and  
193 multiple linear regression (MLR) analyses to predict porewater CH<sub>4</sub>  
194 concentrations from methanogen and methanotroph relative abundances, as  
195 measured via 16S rRNA gene amplicon sequencing data. When using either  
196 PLSR or MLR to predict porewater CH<sub>4</sub> concentrations, a better prediction was  
197 achieved when both depth-resolved abiotic variables (*i.e.*, depth, TOC, DIC,  
198 <sup>13</sup>C<sub>TOC</sub>, S, and TOC:TS, see methods) and the relative abundances of predicted  
199 CH<sub>4</sub>-cycling organisms were included (PLSR:  $r^2 = 0.640$ ,  $p = 0.00001$ , MLR:  
200 adjusted  $r^2 = 0.752$ ,  $p = 0.0003$ ), relative to including the abiotic variables alone  
201 (PLSR:  $r^2 = 0.390$ ,  $p = 0.002$ , MLR: adjusted  $r^2 = 0.532$ ,  $p = 0.0004$ ) (Figure  
202 4A,B, Supplementary Table 11). These results suggest that direct measurements  
203 of microbial abundances could contribute to more accurate predictions of future  
204 CH<sub>4</sub> emissions, consistent with previous statistical models that have linked



205 specific microbiota to C- and/or CH<sub>4</sub>-cycling dynamics in marine ecosystems and  
206 thawing permafrost peatlands<sup>24-28</sup>.

207 By expanding our PLSR analyses to consider the full microbial community,  
208 in addition to known CH<sub>4</sub>-cyclers, our ability to predict CH<sub>4</sub> concentrations  
209 improved further. This analysis considered the following groupings of 16S rRNA  
210 gene abundances as explanatory variables for the prediction of porewater CH<sub>4</sub>  
211 concentrations: 1) each operational taxonomic unit (OTU) at > 1 % relative  
212 abundance in any sample (Supplementary Table 4), 2) summed lineage  
213 abundances of all bacteria and archaea (mostly at the phylum or class levels,  
214 see Figure S3 for groupings), and 3) summed abundances of the most highly  
215 resolved lineage representative in the amplicon data for each metagenome-  
216 assembled genome (MAG, a population genome computationally reconstructed  
217 from shotgun metagenomic community DNA sequencing data, Supplementary  
218 Table 12). In two cases, a MAG was linked directly to a specific OTU in the  
219 amplicon data through a co-binned 16S rRNA gene sequence in the MAG, such  
220 that the MAG relative abundance could be inferred from the amplicon data. In all  
221 other cases, the summed abundances of amplicon OTUs in the same lineage as  
222 the MAG were used as proxies for MAG abundances.

223 Four of the top five microbial groups most predictive of porewater CH<sub>4</sub>  
224 concentrations in the PLSR analyses were lineages for which we were able to  
225 reconstruct a MAG (Figure 4C, Supplementary Tables 13-14), thus organization  
226 into MAGs helped to unravel the specific metabolic processes most predictive of  
227 carbon chemistry. In total, five MAGs were reconstructed with > 85 %

228 completeness and < 6 % contamination (Supplementary Discussion). The best  
229 overall predictor of porewater CH<sub>4</sub> concentrations was the Syntrophaceae class  
230 of Deltaproteobacteria, which was considered in the PLSR analysis as the  
231 summed abundance of all OTUs in this clade. Syntrophaceae are known to be  
232 syntrophic (obligately mutualistic) with methanogens and produce the hydrogen  
233 needed for methanogenesis<sup>29</sup>. Consistent with hydrogen production, the  
234 Syntrophaceae MAG revealed 15 hydrogenase-associated genes, along with the  
235 capacity to ferment diverse carbon compounds (particularly carbon-sulfur  
236 compounds), with the added potential capacity for respiration (see  
237 Supplementary Discussion). Though the Syntrophaceae were overall most  
238 predictive of porewater CH<sub>4</sub> concentrations, the most significantly predictive  
239 single OTU was a member of the candidate phylum Aminicenantes, which we  
240 also recovered as a MAG. While this lineage has been previously predicted to be  
241 fermentative, saccharolytic, and/or aerobic<sup>30-32</sup>, our lake sediment genome  
242 revealed metabolic potential for several C1 metabolic processes, including  
243 methylotrophy through the assimilation of methylamines, methane-thiols, and/or  
244 dimethylsulfide, similar to previous recoveries of complete Wood-Ljungdahl  
245 pathways for C1 metabolism via carbonyl and methyl pathways in this lineage<sup>33</sup>.  
246 The predicted capacity for methylotrophy could explain the strong correlation  
247 between Aminicenantes relative abundance and porewater CH<sub>4</sub> concentrations.

248         The relative abundances of two other lineages with MAGs, the  
249 Thermoplasmata (a group of Archaea) and Phycisphaerae (a class of  
250 Planctomycetes bacteria), were also strongly predictive of both porewater CH<sub>4</sub>

251 concentrations in the PLSR analysis and of calculated fugitive CH<sub>4</sub> in linear  
252 regressions (Supplementary Tables 14-15). Phylogenetic analyses showed that  
253 the Thermoplasmata MAG was derived from a divergent member of the  
254 Thermoplasmatales order, and it encodes the capacity for CO<sub>2</sub> production from  
255 formate, along with peptide and amino acid degradation (as previously  
256 indicated<sup>34</sup>) and complex carbon degradation. Our recovered Phycisphaerae  
257 population genome appears to have the capacity to metabolize a wide variety of  
258 complex carbon compounds, potentially via fermentation, consistent with  
259 previous predictions for the Planctomycetes phylum<sup>35</sup>. While direct ties to CH<sub>4</sub>  
260 are not obvious in these two genomes, we speculate that their contributions to  
261 overall carbon cycling may be driving these strong correlations with CH<sub>4</sub>  
262 concentrations and emissions.

263         Interestingly, the only lineage represented by a MAG that was not a  
264 significant predictor of porewater CH<sub>4</sub> concentrations in the PLSR analysis was a  
265 member of the archaeal Methanomassiliicoccales, a lineage previously  
266 presumed to consist exclusively of obligate H<sub>2</sub>-dependent methylotrophic  
267 methanogens<sup>36,37</sup>. While we cannot make a definitive claim based on a single  
268 MAG, we hypothesize that our lake sediment Methanomassiliicoccales  
269 population does not have the capacity for methanogenesis, as we did not recover  
270 any genes from the methanogenesis pathway in this 95% complete genome. The  
271 genome does encode a complete pathway for propionate fermentation and  
272 partial pathways that may be indicative of the potential to ferment benzoate,  
273 butyrate, and succinate.

274           In conclusion, we found significant differences in the slope of the  
275 temperature vs. CH<sub>4</sub> flux relationship between sub-arctic lake edges and  
276 middles, suggesting that radiative forcing (temperature) and a concomitant  
277 increase in microbial metabolic rates are not the only primary controls on CH<sub>4</sub>  
278 emissions. Significant differences in microbial community composition between  
279 lake edges and middles, including significantly higher methanogen abundances  
280 in lake middles, and significantly higher CH<sub>4</sub> emissions from lake middle  
281 sediments when incubated at the same temperatures as lake edges suggest that  
282 sediment microbial community composition contributes to spatial differences in  
283 the response of CH<sub>4</sub> emissions to increasing temperature. In addition, the  
284 abundances of CH<sub>4</sub>-cycling organisms and their reconstructed population  
285 genomes (MAGs) were significantly better predictors of sediment CH<sub>4</sub>  
286 concentrations than abiotic variables alone. Syntrophic lineages, which can  
287 generate the hydrogen required for hydrogenotrophic methanogenesis, and  
288 lineages capable of C degradation to CO<sub>2</sub> (also potentially ‘upstream’ of  
289 methanogenesis) were also predictive of sediment CH<sub>4</sub> concentrations. Together,  
290 these results suggest that when lake middles reach the temperatures of lake  
291 edges, they may emit even more CH<sub>4</sub> than the lake edges currently do, such that  
292 our projected future CH<sub>4</sub> emissions may be underestimating contributions from  
293 subarctic lakes, and that knowledge of microbial community composition and  
294 metabolism could improve these predictions. Future investigations that consider  
295 the combined effects of microbiota, carbon quality, and temperature on lake CH<sub>4</sub>

296 emissions will help to provide a more comprehensive understanding of  
297 spatiotemporal controls on global CH<sub>4</sub> emissions.

298

## 299 **Methods**

### 300 *Field site and sample collection*

301 Stordalen Mire is a subarctic peatland complex located 10 km east of  
302 Abisko in northern Sweden (68°21'N, 19°02'E). Lakes Mellersta Harrsjön and  
303 Inre Harrsjön are 1.1 and 2.3 ha in area, reaching maximum depths of 7 and 5 m,  
304 respectively<sup>38</sup>. These lakes are post-glacially formed. Mellersta Harrsjön receives  
305 water from a small stream while Inre Harrsjön is fed through groundwater and  
306 runoff from the surrounding mire. Ebullitive and diffusion-limited CH<sub>4</sub> emissions  
307 from these lakes have been documented, using floating funnels and chambers  
308 distributed across the lakes and sampled frequently<sup>2,9,12</sup>. Ebullition varies  
309 spatially with higher emissions from shallow zones and in the presence of  
310 plants<sup>9,15</sup>.

311 We collected quadruplicate sediment cores (four cores from two locations  
312 in each of two lakes: Mellersta Harrsjön edge (68°357832'N, 19°042046'E) and  
313 middle (68°358291'N, 19°042132'E) and Inre Harrsjön edge (68°357880'N,  
314 19°048525'E) and middle (68°358418'N, 19°045650'E)) on July 10 and 18, 2012  
315 at the Stordalen Mire nature reserve, a research site near Abisko, northern  
316 Sweden (Supplementary Table 1). Samples were taken from cores (as described  
317 below) along a depth gradient (ranging from 4 - 40 cm) for geochemical  
318 measurements and microbial DNA sequencing data.

319 *Geochemical data collection and analysis*

320 For each set of four cores, we sampled the first core for sediment C, N,  
321 and S (weight percent), percent total organic carbon, and bulk sediment  $^{13}\text{C}_{\text{TOC}}$   
322 and  $^{15}\text{N}_{\text{TOC}}$ . Samples of  $1\text{ cm}^3$  were taken in 6 cm increments from the top of the  
323 core to the bottom. The samples were then dried, ground, and split into an  
324 untreated sample for total carbon (C) and an acidified TOC sample. Details  
325 regarding sample preparation for measurement on a Perkin Elmer 2400 Series II  
326 CHNS/O Elemental Analyzer at the University of New Hampshire (UNH) were  
327 described previously<sup>15</sup>. Repeatability error was established by analyzing replicate  
328 samples and calculating the standard deviation. Duplicate samples were run  
329 approximately every 10 samples. Potential outliers were also run in duplicate.  
330 Isotopic analysis was performed by combusting dried sediment samples in a  
331 Costech ECS 4010 elemental analyzer coupled to a Thermo Trace GC Ultra  
332 isotope ratio mass spectrometer (IRMS), based on calibration with acetanilide,  
333 Atlantic cod, black spruce needles, sorghum flour, corn gluten, NIST 1515 apple  
334 leaves and tuna muscle standards (UNH Stable Isotope Lab). In 2013 we also  
335 collected sediment cores in the same locations in these lakes. We report  
336 sediment textural analyses from these cores as % sand, % silt, and % clay  
337 (Supplementary Table 3). Those samples were dried and run through a laser  
338 particle size analyzer (Malvern Mastersizer 2000).

339 The second replicate core was used for quantifying total  $\text{CH}_4$  in the core  
340 sediment reported in  $\mu\text{M}$ . After coring, we pulled  $2\text{ cm}^3$  sediment plugs using cut  
341 plastic syringes through pre-drilled holes cut at 4 cm increments along the core

342 liner. The sediment plugs were transferred to 30 ml serum vials containing 5 ml  
343 of 2 M NaOH, capped quickly and shaken<sup>39,40</sup>. After sitting overnight then heating  
344 for 1 hour at 60 °C, the headspace of the vials was analyzed for CH<sub>4</sub> using a  
345 Shimadzu GC-2014 gas chromatograph with a flame ionizing detector<sup>9</sup>. The CH<sub>4</sub>  
346 measured represents the total, that is, nearly all of the CH<sub>4</sub> dissolved in the water  
347 from the sediment plug and any bubbles that may have been trapped in the  
348 sediment. The remaining sediment samples in the vials were weighed and dried  
349 to constant weight to determine the mass of water in the samples to be used for  
350 calculating the CH<sub>4</sub> concentration in μM.

351 The third replicate core was used for measurement of DIC. Rhizon  
352 samplers were inserted every 2 cm through pre-drilled holes in the core and a  
353 vacuum was pulled with a 30 ml polypropylene syringe. The first ~1 ml of  
354 sediment water was discarded because of contamination with DI water. After 10  
355 ml of sediment pore water was collected, it was injected to a 30 ml evacuated  
356 serum vial with 1 ml 30% H<sub>4</sub>PO<sub>4</sub> solution. This caused forms of inorganic C in the  
357 water to form CO<sub>2</sub>. A headspace sample was then extracted and run on an  
358 infrared gas analyzer (IRGA) to determine the CO<sub>2</sub> concentration.

359 Methods for measuring ebullition and water temperature have been  
360 described previously<sup>9</sup>. In brief, measurements of CH<sub>4</sub> bubble flux during the ice-  
361 free season (June to September) have been ongoing at these lakes since 2009.  
362 A total of 40 bubble traps, distributed in a depth-stratified sampling scheme were  
363 sampled frequently (every 1-3 days). For this study, averages of CH<sub>4</sub> bubble flux  
364 were calculated for each lake by binning data from edge and middle areas

365 separately in 1°C intervals (total of 4-22°C) of corresponding surface sediment  
366 temperature. For this we used flux and temperature data collected from 2009-  
367 2014. Water and surface sediment temperatures were measured in profiles  
368 continuously using intercalibrated Onset HOBO v22 loggers, as previously  
369 described<sup>9</sup> (data are available here: <https://bolin.su.se/data/>). The binned flux  
370 data were used to construct Arrhenius equations in order to investigate  
371 differences in temperature response on the ebullition from edge and middle  
372 areas.

373 Porewater isotopic composition was determined in samples from cores  
374 collected in the same locations in 2014. Methods were described previously<sup>24</sup>.  
375 Briefly, sample vials that were collected for CH<sub>4</sub> and dissolved inorganic carbon  
376 (DIC) were acidified with 0.5 ml of 21% H<sub>3</sub>PO<sub>4</sub> and brought to atmospheric  
377 pressure with helium. The sample headspace was analyzed for d13C of CH<sub>4</sub> and  
378 CO<sub>2</sub> on a continuous-flow Hewlett-Packard 5890 gas chromatograph (Agilent  
379 Technologies) at 40°C coupled to a FinniganMAT Delta S isotope ratio mass  
380 spectrometer via a ConFlo IV interface system (Thermo Scientific).

381

### 382 *DNA extraction and 16S rRNA gene sequencing*

383 A fourth replicate core was collected for DNA extraction. After coring, we  
384 pulled 2 cm<sup>3</sup> sediment plugs using cut plastic syringes through pre-drilled holes  
385 cut at 4 cm increments along the core liner. Samples were immediately put in  
386 Eppendorf tubes and placed in a cooler until returned to the research station  
387 where they were stored at -80 °C until extraction.



388 For DNA extraction from each core depth range, 0.25 g of sediment was  
389 collected under sterile conditions and added to a MoBio PowerSoil DNA Isolation  
390 Kit (MoBio, Inc., Carlsbad, CA, USA). DNA was extracted according to the  
391 manufacturer's instructions. PCR amplification and sequencing were performed  
392 at the Environmental Sample Preparation and Sequencing Facility (ESPSF) at  
393 Argonne National Laboratory, in accordance with previously described  
394 protocols<sup>41-43</sup>. Briefly, 515F and barcoded 806R primers with Illumina flowcell  
395 adapter sequences were used to amplify the V4 region of bacterial and archaeal  
396 16S rRNA genes<sup>44</sup>. Each 25 µl PCR reaction contained 12 µl of PCR water  
397 (MoBio, Inc., Carlsbad, CA, USA), 10 µl of 1x 5 PRIME Hot Master Mix (5 PRIME  
398 Inc., Bethesda, MD, USA), 1 µl each of F and R primers (5 µM concentration,  
399 200 pM final), and 1 µl of template DNA. PCR cycling conditions were as follows:  
400 94 °C for 3 min, 35 cycles of [94 °C for 45 s, 50 °C for 60 s, and 72 °C for 90 s],  
401 72 °C for 10 min. A PicoGreen assay (Life Technologies, Grand Island, NY, USA)  
402 was used to measure amplicon concentrations. Equimolar concentrations for  
403 each barcoded sample were combined and then cleaned with the UltraClean  
404 PCR Clean-Up Kit (MoBio Inc., Carlsbad, CA, USA) and then quantified using the  
405 Qubit (Invitrogen, Carlsbad, CA, USA). The pool was then diluted to 2 nM,  
406 denatured, and then diluted to a final concentration of 4 pM with a 10% PhiX  
407 spike for sequencing on the Illumina MiSeq platform.

#### 408 *Quantitative PCR (qPCR)*

409 A quantitative polymerase chain reaction (qPCR) was performed to  
410 measure microbial abundances in units of 16S rRNA gene copies per g wet

411 sediment<sup>43,45</sup>. Each reaction used 5 µl of 2X SYBR Green PCR Master Mix  
412 (Applied Biosystems, Carlsbad, CA, USA), 4 µl of template DNA, and 1 µl of  
413 primer mix. The 16S rRNA gene 1406F/1525R primer set (0.4 µM, F -  
414 GYACWCACCGCCCGT and R - AAGGAGGTGWTCCARCC) was designed to  
415 amplify bacterial and archaeal 16S rRNA genes. The rpsL primer pair (0.2 µM, F  
416 - GTAAAGTATGCCGTGTTCGT and R - AGCCTGCTTACGGTCTTTA) was  
417 used for inhibition control samples to amplify *Escherichia coli* DH10B only. Three  
418 dilutions (1/100, 1/500, and 1/1000), as well as an inhibition control (1/100  
419 dilution of *E. coli* DH10B genomic DNA spiked into a 1/100 dilution of the sample),  
420 were run in triplicate for each sample and standard. For the standards, *E. coli*  
421 DH10B genomic DNA dilutions of 10<sup>-2</sup>, 10<sup>-3</sup>, 10<sup>-4</sup>, 10<sup>-5</sup> and 10<sup>-6</sup> of the 20 ng/µl  
422 stock solution were used. The qPCRs were run on the ViiA7 Real-Time PCR  
423 System (Applied Biosystems, Carlsbad, CA, USA), with cycling conditions as  
424 follows: 10 min at 95 °C, 40 cycles of [15 s at 95 °C, then 20 s at 55 °C, then 30  
425 s at 72 °C]. A melt curve was produced by running a cycle of 2 min at 95 °C and  
426 a final cycle of 15 s at 60 °C. The cycle threshold (Ct) values were recorded and  
427 analyzed using ViiA7 v1.2 software, and 16S rRNA gene copy numbers were  
428 calculated for each sample, accounting for the genome size (4,686,137 bp) and  
429 16S rRNA gene copy number (7) of the standard.

#### 430 *Incubations for CH<sub>4</sub> production rates*

431 Anaerobic incubations of lake sediment samples were performed to  
432 assess rates of production of CH<sub>4</sub>. Four replicate sediment samples (4 ml) from  
433 three depths in 2012 (0-5, 10, 20 cm) were collected in the field and immediately

434 sealed in a 120 ml serum vial. The headspace was flushed for 5 minutes with  
435 UHP N<sub>2</sub> to establish an anaerobic headspace. The vials were stored in coolers,  
436 taken to the research station, and then stored as follows: 2 vials were incubated  
437 at 5°C and 2 vials were held at room temperature (22°C) for each depth. Five ml  
438 of headspace was sampled daily for five days and analyzed on a Flame  
439 Ionization Gas Chromatograph (GC) to determine CH<sub>4</sub> fluxes. Fluxes were  
440 normalized by sediment mass after incubations when vials were dried and  
441 weighed to determine sediment dry weight. We also report data from incubations  
442 in 2013 that were run the same way with samples collected at depths consistent  
443 with changes in core sediment transitions: Inre Harrsjön edge: 2.5, 27.5, 47.5 cm;  
444 Inre Harrsjön middle: 4.5, 35, 60 cm; Mellersta Harrsjön edge: 7.5, 22.5, 37.5 cm;  
445 and Mellersta Harrsjön middle: 2.5, 27.5, 47.5 cm.

#### 446 *Calculations of depth-resolved fugitive CH<sub>4</sub>*

447 Depth-resolved fugitive CH<sub>4</sub> (CH<sub>4</sub> released from the sediments) was  
448 calculated from concentration and stable carbon isotopic composition of CH<sub>4</sub> and  
449 DIC in sediment porewater<sup>46</sup>. The approach leverages that fact that 1) microbial  
450 fermentation and respiration, which generate CO<sub>2</sub>, do not fractionate carbon,  
451 while methanogenesis, which generates CH<sub>4</sub> and CO<sub>2</sub> (1:1), does fractionate  
452 carbon, and 2) that DIC largely remains dissolved in water while dissolved CH<sub>4</sub>  
453 escapes porewater by ebullition. In this framework, the measured isotopic  
454 composition of CH<sub>4</sub> in porewater was used to calculate the fraction factor  
455 associated with methanogenesis, assuming the starting isotopic composition of  
456 the substrate matched that measured for organic carbon in the sediment. This

457 fractionation factor, along with the measured isotopic composition of DIC in  
458 porewater, was used to determine the relative amount of DIC that came from  
459 methanogenesis versus non-fractionating pathways (e.g., fermentation). Because  
460 any CO<sub>2</sub> produced was assumed to stay dissolved in porewater, the relative  
461 amount of DIC generated from methanogenesis could be multiplied by the  
462 measured concentration of DIC to determine the concentration of CO<sub>2</sub> and CH<sub>4</sub>  
463 generated through methanogenesis. This generated CH<sub>4</sub> concentration was  
464 larger than the actual measured concentration of CH<sub>4</sub> in porewater, and the  
465 difference between the two was assigned as 'fugitive' methane. Calculations  
466 assumed that the system was at steady state.

#### 467 *16S rRNA gene sequence processing and OTU table generation for microbial* 468 *analyses*

469 Sequences were processed as previously described<sup>43</sup>. Briefly, after  
470 demultiplexing by sample, each pair of forward and reverse 16S rRNA gene  
471 reads was merged. Sequences were then quality-filtered, and singletons were  
472 removed with QIIME<sup>47</sup> and UPARSE<sup>48</sup>. Dereplicated sequences were then  
473 clustered at 97% nucleotide identity using UCLUST v7<sup>49</sup> to generate a database  
474 containing one sequence for each operational taxonomic unit (OTU). Sequencing  
475 reads from the full dataset were then clustered to the database to generate an  
476 OTU table. Each OTU was assigned taxonomy via the Ribosomal Database  
477 Project taxonomic classifier<sup>50</sup>, and all OTUs assigned as mitochondria or  
478 chloroplasts were removed. The resulting OTU table was rarefied to 3,000 16S  
479 rRNA gene sequences per sample. Following this OTU table curation, 36

480 samples across 21 core-depth combinations were retained, of which 30 were  
481 replicates (*i.e.*, 15 pairs). For each pair of replicates, each OTU count was  
482 averaged (for 14 of 15 pairs, replicates were indistinguishable, Figure S6), and  
483 the averages were used for all downstream analyses. For the six samples  
484 without successful replicates, OTU counts from a single sample were used.  
485 *Metagenomic sequencing, genome reconstruction and annotation, and methane-*  
486 *cycling functional gene characterization*

487       Based on preliminary 16S rRNA gene amplicon sequencing data from 8  
488 samples (IHM4, IHM36, IHE4, IHE28, MHM4, MHM34, MHE4, and MHE16),  
489 three samples with the most distinct microbial communities (IHM4, IHE28, and  
490 MHE16) were selected for metagenomic sequencing to maximize recovery of  
491 diverse microbial populations. DNA (from the same extractions described above  
492 for 16S rRNA gene sequencing) was sent to the Australian Centre for  
493 Ecogenomics for metagenomic library construction and sequencing on the  
494 Illumina NextSeq platform, as previously described<sup>25,26</sup>. Metagenomic assembly,  
495 genome binning to recover microbial metagenome-assembled genomes (MAGs),  
496 and annotation (to predict gene functions and reconstruct metabolic pathways)  
497 were performed as previously described<sup>51</sup>. Briefly, each metagenome was  
498 separately assembled using the CLC *de novo* assembler v4.4.1 (CLCBio,  
499 Denmark), reads were mapped to contigs using BWA v0.7.12-r1039<sup>52</sup>, and the  
500 mean coverage of contigs was obtained using the ‘coverage’ command of  
501 CheckM v1.0.6<sup>53</sup>. Genomes were binned using MetaBAT v0.26.3<sup>54</sup> with all five  
502 preset parameters (verysensitive, sensitive, specific, veryspecific, superspecific),

503 and genome completeness and contamination were estimated using CheckM<sup>53</sup>.  
504 To investigate predicted metabolic functions of interest in the metagenomic data,  
505 metagenomic reads with sequence similarity to genes diagnostic of specific  
506 metabolic functions (*e.g.*, methane monooxygenase, *pmoA*, and methyl-  
507 coenzyme M reductase, *mcrA*, indicative of aerobic methane oxidation and  
508 methanogenesis, respectively) were identified using GraftM<sup>55</sup>.

#### 509 *Sequencing data availability*

510 Data are currently available here: [https://isogenie-db.asc.ohio-](https://isogenie-db.asc.ohio-state.edu/datasources#lake_data)  
511 [state.edu/datasources#lake\\_data](https://isogenie-db.asc.ohio-state.edu/datasources#lake_data) . Upon publication, sequencing data from this  
512 study will be available at NCBI, with accession numbers provided here.

#### 513 *Statistical analyses*

514 Unless otherwise indicated, statistical analyses were performed using  
515 PRIMER v7<sup>56,57</sup>. The rarefied OTU table was square-root transformed, and Bray-  
516 Curtis similarity matrices were generated for sample comparisons and used to  
517 make a Principal Coordinates Analysis (PCoA) plot. We used permutational  
518 ANOVA (PERMANOVA) to test for significant differences in microbial community  
519 composition between categorical groups of samples (*e.g.*, between the two lakes  
520 and between the edges and middles of the lakes), and we used Mantel tests with  
521 Spearman's rank correlations to compare microbial community composition  
522 (Bray-Curtis similarity matrices) to continuous variables (Euclidean distance  
523 matrices), including sediment depth and biogeochemical data. ANOVA and linear  
524 regression analyses (Supplementary Tables 8 and 15) were performed with  
525 StatPlus v6.1.7.0.

526 We performed partial least squares regressions (PLSR) in the R  
527 programming language via the package PLS (function PLSR)<sup>58-60</sup> to predict  
528 measured sediment CH<sub>4</sub> concentrations from biotic and abiotic variables, similar  
529 to our previously described PLSR analyses<sup>25</sup>. Briefly, PLSR models a causal  
530 relationship between explanatory variable(s) (in this case, abundances of abiotic  
531 measurements and/or microorganisms) and the response variable being  
532 predicted (here, measured sediment CH<sub>4</sub> concentrations). Abiotic variables  
533 included all depth-resolved abiotic measurements that were not directly related to  
534 CH<sub>4</sub>, as such measurements could be confounding variables in our analysis. The  
535 included abiotic variables were: depth, TOC, <sup>13</sup>C<sub>TOC</sub>, DIC, S, and TOC:TS. The  
536 PLSR analysis yielded Pearson's product moment correlations between  
537 measured environmental and/or geochemical variables, the abundances of  
538 microbial lineages, and the abundances of specific microbial populations,  
539 allowing for a quantification of the added value of microbial abundances in  
540 predicting sediment CH<sub>4</sub> concentrations, relative to predictions from abiotic  
541 factors alone. Variance in projection (VIP) scores for each explanatory variable  
542 indicate the extent to which that variable was predictive of the response variable  
543 (*i.e.*, sediment CH<sub>4</sub> concentrations), with VIP scores  $\geq 1$  considered to be highly  
544 significant<sup>61</sup>.

545

## 546 **Acknowledgements**

547 We would like to acknowledge the following funding in support of this  
548 project: the Northern Ecosystems Research for Undergraduates program

549 (NERU; National Science Foundation REU site EAR-1063037, PI Varner), a U.S.  
550 National Science Foundation MacroSystems Biology grant (NSF EF  
551 #1241037, PI Varner), U.S. Department of Energy grants (DE-SC0010580 and  
552 DE-SC0016440, Co-lead PI Rich; DE-SC0010338 and DE-SC0019063, PI  
553 Neumann), the Swedish Research Council (VR) with grants to P. Crill (2007-  
554 4547 and 2013-5562). Thanks to staff at the Polar Research Secretariat's Abisko  
555 Research Station (ANS). Thanks to Kaitlyn Steele, Florencia Fahnestock, Kiley  
556 Remiszewski, Carmody McCalley, and NERU participants Sophia Burke, Joel  
557 DeStasio, Lance Erickson, and Madison Halloran for assistance in sample  
558 collection and analysis, and Jacob Setera and Steve Phillips (UNH) for  
559 assistance with the CHNS elemental analysis.

560

## 561 **References**

562

- 563 1 Wik, M., Varner, R. K., Anthony, K. W., MacIntyre, S. & Bastviken, D.  
564 Climate-sensitive northern lakes and ponds are critical components of  
565 methane release. *Nature Geosci* **9**, 99-105, doi:10.1038/ngeo2578 (2016).
- 566 2 Wik, M. *et al.* Energy input is primary controller of methane bubbling in  
567 subarctic lakes. *Geophysical Research Letters* **41**, 555-560,  
568 doi:10.1002/2013GL058510 (2014).
- 569 3 Holgerson, M. A. & Raymond, P. A. Large contribution to inland water  
570 CO<sub>2</sub> and CH<sub>4</sub> emissions from very small ponds. *Nature Geosci* **9**, 222-  
571 226, doi:10.1038/ngeo2654 (2016).
- 572 4 Tan, Z. & Zhuang, Q. Arctic lakes are continuous methane sources to the  
573 atmosphere under warming conditions. *Environmental Research Letters*  
574 **10**, 054016, doi:10.1088/1748-9326/10/5/054016 (2015).
- 575 5 Verpoorter, C., Kutser, T., Seekell, D. A. & Tranvik, L. J. A global inventory  
576 of lakes based on high-resolution satellite imagery. *Geophysical Research*  
577 *Letters* **41**, 6396-6402, doi:10.1002/2014GL060641 (2014).
- 578 6 Walter, K. M., Smith, L. C. & Chapin, F. S. Methane bubbling from  
579 northern lakes: present and future contributions to the global methane  
580 budget. *Philosophical Transactions of the Royal Society A: Mathematical,*  
581 *Physical, and Engineering Sciences* **365**, 1657-1676 (2007).



- 582 7 van Huissteden, J. *et al.* Methane emissions from permafrost thaw lakes  
583 limited by lake drainage. *Nature Clim. Change* **1**, 119-123 (2011).
- 584 8 Schuur, E. A. G. *et al.* Vulnerability of Permafrost Carbon to Climate  
585 Change: Implications for the Global Carbon Cycle. *BioScience* **58**, 701-  
586 714, doi:10.1641/B580807 (2008).
- 587 9 Wik, M., Crill, P. M., Varner, R. K. & Bastviken, D. Multiyear  
588 measurements of ebullitive methane flux from three subarctic lakes.  
589 *Journal of Geophysical Research: Biogeosciences* **118**, 1307-1321,  
590 doi:10.1002/jgrg.20103 (2013).
- 591 10 Bastviken, D., Tranvik, L. J., Downing, J. A., Crill, P. M. & Enrich-Prast, A.  
592 Freshwater Methane Emissions Offset the Continental Carbon Sink.  
593 *Science* **331**, 50, doi:10.1126/science.1196808 (2011).
- 594 11 Chanton, J. P. The effect of gas transport on the isotope signature of  
595 methane in wetlands. *Organic Geochemistry* **36**, 753-768, (2005).
- 596 12 Jansen, J. *et al.* Climate-Sensitive Controls on Large Spring Emissions of  
597 CH<sub>4</sub> and CO<sub>2</sub> From Northern Lakes. *Journal of Geophysical Research:*  
598 *Biogeosciences* **124**, 2379-2399, doi:10.1029/2019JG005094 (2019).
- 599 13 Lundin, E. J. *et al.* Is the subarctic landscape still a carbon sink? Evidence  
600 from a detailed catchment balance. *Geophysical Research Letters* **43**,  
601 1988-1995, doi:10.1002/2015GL066970 (2016).
- 602 14 Thornton, B. F., Wik, M. & Crill, P. M. Climate-forced changes in available  
603 energy and methane bubbling from subarctic lakes. *Geophysical*  
604 *Research Letters* **42**, 1936-1942, doi:10.1002/2015GL063189 (2015).
- 605 15 Wik, M. *et al.* Sediment Characteristics and Methane Ebullition in Three  
606 Subarctic Lakes. *Journal of Geophysical Research: Biogeosciences* **123**,  
607 2399-2411, doi:10.1029/2017JG004298 (2018).
- 608 16 Tranvik, L. J. *et al.* Lakes and reservoirs as regulators of carbon cycling  
609 and climate. *Limnol. Oceanogr.* **54**, 2298-2314,  
610 doi:10.4319/lo.2009.54.6\_part\_2.2298 (2009).
- 611 17 Alperin, M. J., Albert, D. B. & Martens, C. S. Seasonal variations in  
612 production and consumption rates of dissolved organic carbon in an  
613 organic-rich coastal sediment. *Geochimica et Cosmochimica Acta* **58**,  
614 4909-4930 (1994).
- 615 18 Duc, N. T., Crill, P. & Bastviken, D. Implications of temperature and  
616 sediment characteristics on methane formation and oxidation in lake  
617 sediments. *Biogeochemistry* **100**, 185-196, doi:10.1007/s10533-010-9415-  
618 8 (2010).
- 619 19 Winkel, M. *et al.* First evidence for cold-adapted anaerobic oxidation of  
620 methane in deep sediments of thermokarst lakes. *Environmental*  
621 *Research Communications* **1**, 021002 (2019).
- 622 20 Ruuskanen, M. O., St. Pierre, K. A., St. Louis, V. L., Aris-Brosou, S. &  
623 Poulain, A. J. Physicochemical Drivers of Microbial Community Structure  
624 in Sediments of Lake Hazen, Nunavut, Canada. *Frontiers in Microbiology*  
625 **9**, doi:10.3389/fmicb.2018.01138 (2018).
- 626 21 Kokfelt, U. *et al.* Wetland development, permafrost history and nutrient  
627 cycling inferred from late Holocene peat and lake sediment records in

- 628 subarctic Sweden. *Journal of Paleolimnology* **44**, 327-342,  
629 doi:10.1007/s10933-010-9406-8 (2010).
- 630 22 Rissanen, A. J. *et al.* Vertical stratification of bacteria and archaea in  
631 sediments of a small boreal humic lake. *FEMS Microbiology Letters* **366**,  
632 doi:10.1093/femsle/fnz044 (2019).
- 633 23 Evans, P. N. *et al.* An evolving view of methane metabolism in the  
634 Archaea. *Nature Reviews Microbiology* **17**, 219-232, doi:10.1038/s41579-  
635 018-0136-7 (2019).
- 636 24 McCalley, C. K. *et al.* Methane dynamics regulated by microbial  
637 community response to permafrost thaw. *Nature* **514**, 478-481, (2014).
- 638 25 Emerson, J. B. *et al.* Host-linked soil viral ecology along a permafrost thaw  
639 gradient. *Nature Microbiology* **3**, 870-880, doi:10.1038/s41564-018-0190-y  
640 (2018).
- 641 26 Woodcroft, B. J. *et al.* Genome-centric view of carbon processing in  
642 thawing permafrost. *Nature*, doi:10.1038/s41586-018-0338-1 (2018).
- 643 27 Johnston, E. R. *et al.* Responses of tundra soil microbial communities to  
644 half a decade of experimental warming at two critical depths. *Proceedings*  
645 *of the National Academy of Sciences*, 201901307,  
646 doi:10.1073/pnas.1901307116 (2019).
- 647 28 Zinke, L. A. *et al.* Microbial Organic Matter Degradation Potential in Baltic  
648 Sea Sediments Is Influenced by Depositional Conditions and In Situ  
649 Geochemistry. *Applied and Environmental Microbiology* **85**, e02164-02118,  
650 doi:10.1128/AEM.02164-18 (2019).
- 651 29 Morris, B. E. L., Henneberger, R., Huber, H. & Moissl-Eichinger, C.  
652 Microbial syntrophy: interaction for the common good. *FEMS Microbiology*  
653 *Reviews* **37**, 384-406, doi:10.1111/1574-6976.12019 (2013).
- 654 30 Sharon, I. *et al.* Accurate, multi-kb reads resolve complex populations and  
655 detect rare microorganisms. *Genome Research*,  
656 doi:10.1101/gr.183012.114 (2015).
- 657 31 Kadnikov, V. V., Mardanov, A. V., Beletsky, A. V., Karnachuk, O. V. &  
658 Ravin, N. V. Genome of the candidate phylum Aminicenantes bacterium  
659 from a deep subsurface thermal aquifer revealed its fermentative  
660 saccharolytic lifestyle. *Extremophiles* **23**, 189-200, doi:10.1007/s00792-  
661 018-01073-5 (2019).
- 662 32 Robbins, S. J., Evans, P. N., Parks, D. H., Golding, S. D. & Tyson, G. W.  
663 Genome-Centric Analysis of Microbial Populations Enriched by Hydraulic  
664 Fracture Fluid Additives in a Coal Bed Methane Production Well. *Frontiers*  
665 *in Microbiology* **7**, doi:10.3389/fmicb.2016.00731 (2016).
- 666 33 Gies, E. A., Konwar, K. M., Beatty, J. T. & Hallam, S. J. Illuminating  
667 Microbial Dark Matter in Meromictic Sakinaw Lake. *Applied and*  
668 *Environmental Microbiology* **80**, 6807, doi:10.1128/AEM.01774-14 (2014).
- 669 34 Lloyd, K. G. *et al.* Predominant archaea in marine sediments degrade  
670 detrital proteins. *Nature* **496**, 215-218 (2013).
- 671 35 Spring, S., Bunk, B., Spröer, C., Rohde, M. & Klenk, H.-P. Genome  
672 biology of a novel lineage of planctomycetes widespread in anoxic aquatic

- 673 environments. *Environmental Microbiology* **0**, doi:10.1111/1462-  
674 2920.14253 (2018).
- 675 36 Borrel, G. *et al.* Comparative genomics highlights the unique biology of  
676 Methanomassiliicoccales, a Thermoplasmatales-related seventh order of  
677 methanogenic archaea that encodes pyrrolysine. *BMC Genomics* **15**, 679,  
678 doi:10.1186/1471-2164-15-679 (2014).
- 679 37 Vanwonterghem, I. *et al.* Methylophilic methanogenesis discovered in  
680 the archaeal phylum Verstraetearchaeota. *Nature Microbiology* **1**, 16170  
681 (2016).
- 682 38 Wik, M., Crill, P. M., Bastviken, D., Danielsson, Å. & Norbäck, E. Bubbles  
683 trapped in arctic lake ice: Potential implications for methane emissions.  
684 *Journal of Geophysical Research: Biogeosciences* **116**,  
685 doi:10.1029/2011JG001761 (2011).
- 686 39 Magen, C. *et al.* A simple headspace equilibration method for measuring  
687 dissolved methane. *Limnology and Oceanography: Methods* **12**, 637-650,  
688 doi:10.4319/lom.2014.12.637 (2014).
- 689 40 Pimmel, A. & Claypool, G. Introduction to shipboard organic chemistry on  
690 the JOIDES Resolution. (2001).
- 691 41 Bates, S. T. *et al.* Examining the global distribution of dominant archaeal  
692 populations in soil. *ISME J* **5**, 908-917 (2011).
- 693 42 Lauber, C. L., Ramirez, K. S., Aanderud, Z., Lennon, J. & Fierer, N.  
694 Temporal variability in soil microbial communities across land-use types.  
695 *ISME J* **7**, 1641-1650 (2013).
- 696 43 Emerson, J. B. *et al.* Impacts of Flood Damage on Airborne Bacteria and  
697 Fungi in Homes after the 2013 Colorado Front Range Flood.  
698 *Environmental Science & Technology* **49**, 2675-2684,  
699 doi:10.1021/es503845j (2015).
- 700 44 Caporaso, J. G. *et al.* Global patterns of 16S rRNA diversity at a depth of  
701 millions of sequences per sample. *Proceedings of the National Academy*  
702 *of Sciences* **108**, 4516-4522, doi:10.1073/pnas.1000080107 (2010).
- 703 45 Emerson, J. B. *et al.* High temporal variability in airborne bacterial diversity  
704 and abundance inside single-family residences. *Indoor Air* **27**, 576-586,  
705 doi:10.1111/ina.12347 (2017).
- 706 46 Corbett, J. E. *et al.* Partitioning pathways of CO<sub>2</sub> production in peatlands  
707 with stable carbon isotopes. *Biogeochemistry* **114**, 327-340,  
708 doi:10.1007/s10533-012-9813-1 (2013).
- 709 47 Caporaso, J. G. *et al.* QIIME allows analysis of high-throughput  
710 community sequencing data. *Nat Meth* **7**, 335-336 (2010).
- 711 48 Edgar, R. C. UPARSE: highly accurate OTU sequences from microbial  
712 amplicon reads. *Nat Meth* **10**, 996-998 (2013).
- 713 49 Edgar, R. C. Search and clustering orders of magnitude faster than  
714 BLAST. *Bioinformatics*, doi:10.1093/bioinformatics/btq461 (2010).
- 715 50 Wang, Q., Garrity, G. M., Tiedje, J. M. & Cole, J. R. Naive Bayesian  
716 Classifier for Rapid Assignment of rRNA Sequences into the New  
717 Bacterial Taxonomy. *Applied and Environmental Microbiology* **73**, 5261-  
718 5267, doi:10.1128/aem.00062-07 (2007).

- 719 51 Parks, D. H. *et al.* Recovery of nearly 8,000 metagenome-assembled  
720 genomes substantially expands the tree of life. *Nature Microbiology* **2**,  
721 1533-1542, doi:10.1038/s41564-017-0012-7 (2017).
- 722 52 Li, H. & Durbin, R. Fast and accurate short read alignment with Burrows-  
723 Wheeler transform. *Bioinformatics* **25**, 1754-1760,  
724 doi:10.1093/bioinformatics/btp324 (2009).
- 725 53 Parks, D. H., Imelfort, M., Skennerton, C. T., Hugenholtz, P. & Tyson, G.  
726 W. CheckM: assessing the quality of microbial genomes recovered from  
727 isolates, single cells, and metagenomes. *Genome Research*,  
728 doi:10.1101/gr.186072.114 (2015).
- 729 54 Kang, D. D., Froula, J., Egan, R. & Wang, Z. MetaBAT, an efficient tool for  
730 accurately reconstructing single genomes from complex microbial  
731 communities. *PeerJ* **3**, e1165, doi:10.7717/peerj.1165 (2015).
- 732 55 Boyd, J. A., Woodcroft, B. J. & Tyson, G. W. GraftM: a tool for scalable,  
733 phylogenetically informed classification of genes within metagenomes.  
734 *Nucleic Acids Research* **46**, e59-e59, doi:10.1093/nar/gky174 (2018).
- 735 56 Clarke, K. R. Non-parametric multivariate analyses of changes in  
736 community structure. *Australian Journal of Ecology* **18**, 117-143,  
737 doi:10.1111/j.1442-9993.1993.tb00438.x (1993).
- 738 57 Clarke, K. R. & Gorley, R. N. *PRIMER v6: User Manual/Tutorial*.  
739 (Plymouth, 2006).
- 740 58 Lê Cao, K.-A., Rossouw, D., Robert-Granié, C. & Besse, P. in *Statistical*  
741 *Applications in Genetics and Molecular Biology* Vol. 7 (2008).
- 742 59 Shen, H. & Huang, J. Z. Sparse principal component analysis via  
743 regularized low rank matrix approximation. *J. Multivar. Anal.* **99**, 1015-  
744 1034, doi:10.1016/j.jmva.2007.06.007 (2008).
- 745 60 Guidi, L. *et al.* Plankton networks driving carbon export in the oligotrophic  
746 ocean. *Nature* **532**, 465-470 (2016).
- 747 61 Chong, I.-G. & Jun, C.-H. Performance of some variable selection  
748 methods when multicollinearity is present. *Chemometrics and Intelligent*  
749 *Laboratory Systems* **78**, 103-112 (2005).
- 750

Figure 1

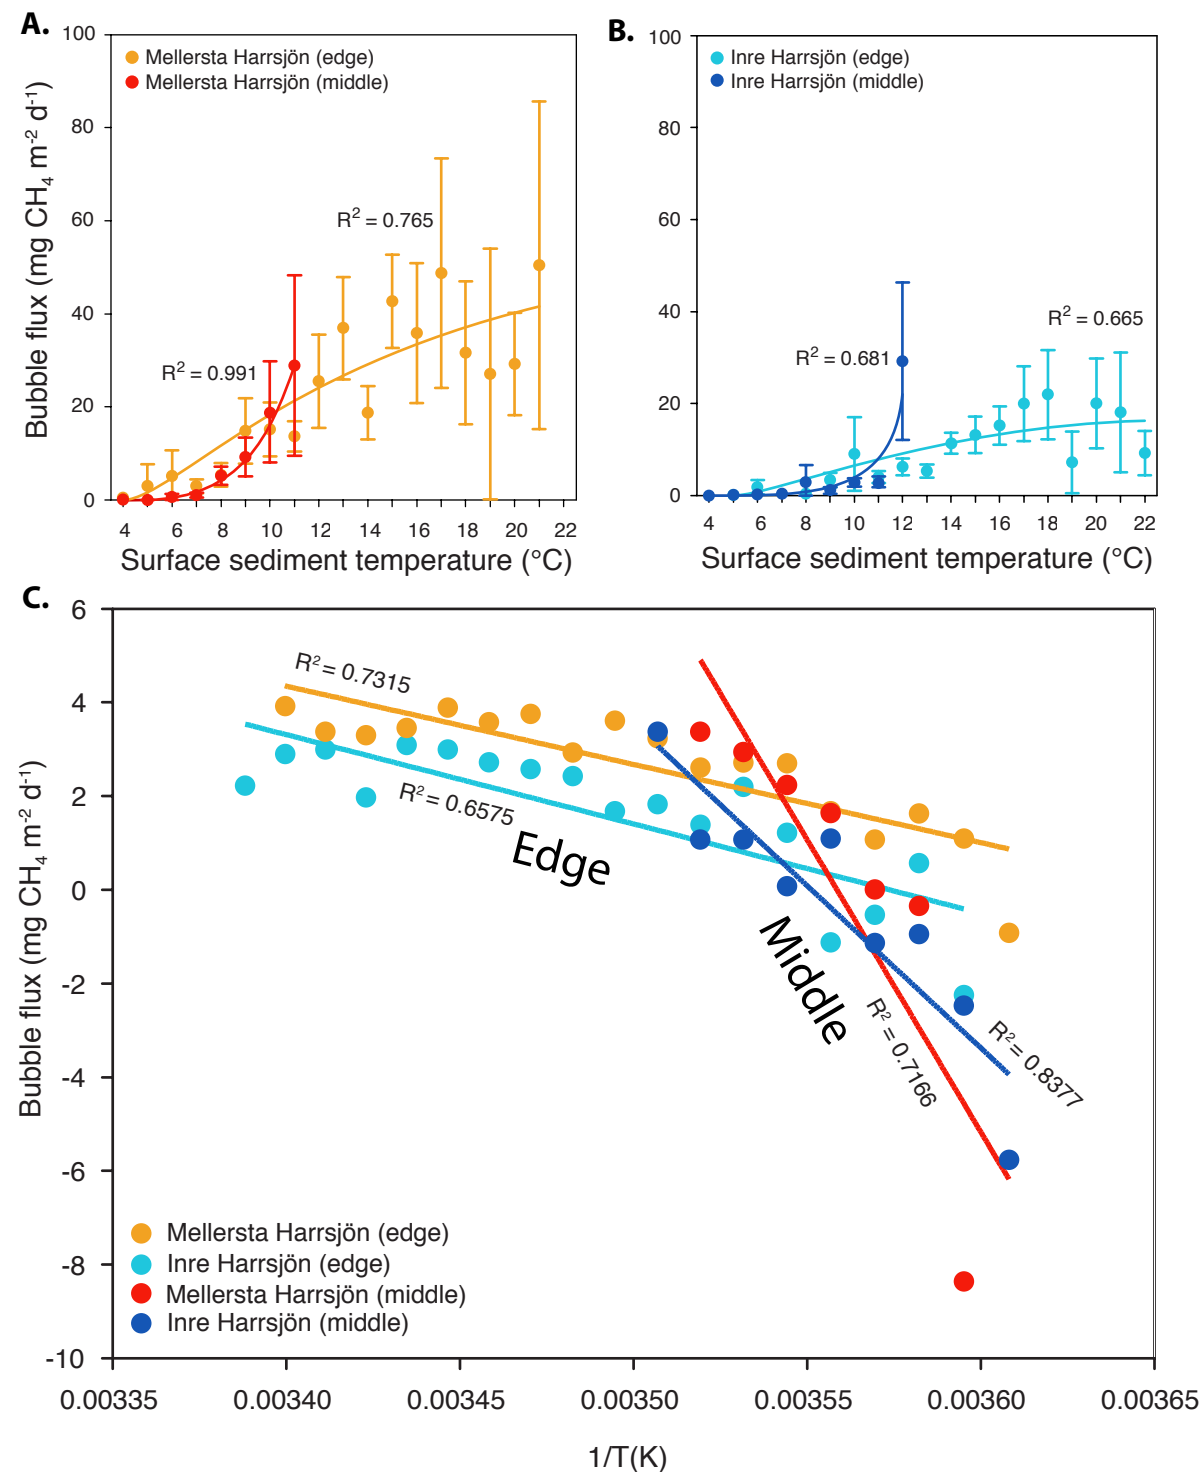

**Figure 1. Temperature responsiveness of ebullitive methane flux from two post-glacial lakes.** Ebullitive  $\text{CH}_4$  flux as a function of surface sediment temperature (data were binned in  $1^{\circ}\text{C}$  intervals; see methods) for the edge versus middle regions of: **A.** Lake Mellersta Harrsjön (MH) and **B.** Lake Inre Harrsjön (IH), from June - September 2009 - 2014; MH edge -  $n = 1,609$ , MH middle -  $n = 810$ , IH edge -  $n = 2,347$ , IH middle -  $n = 549$ . Error bars are 95% confidence intervals, fit lines are 2nd degree polynomials. **C.** Arrhenius plots of the data in A & B;  $\ln(\text{bubble CH}_4 \text{ flux})$  versus the inverse surface sediment temperature in K. Data are color-coded by lake and by edge and middle areas.



Figure 2

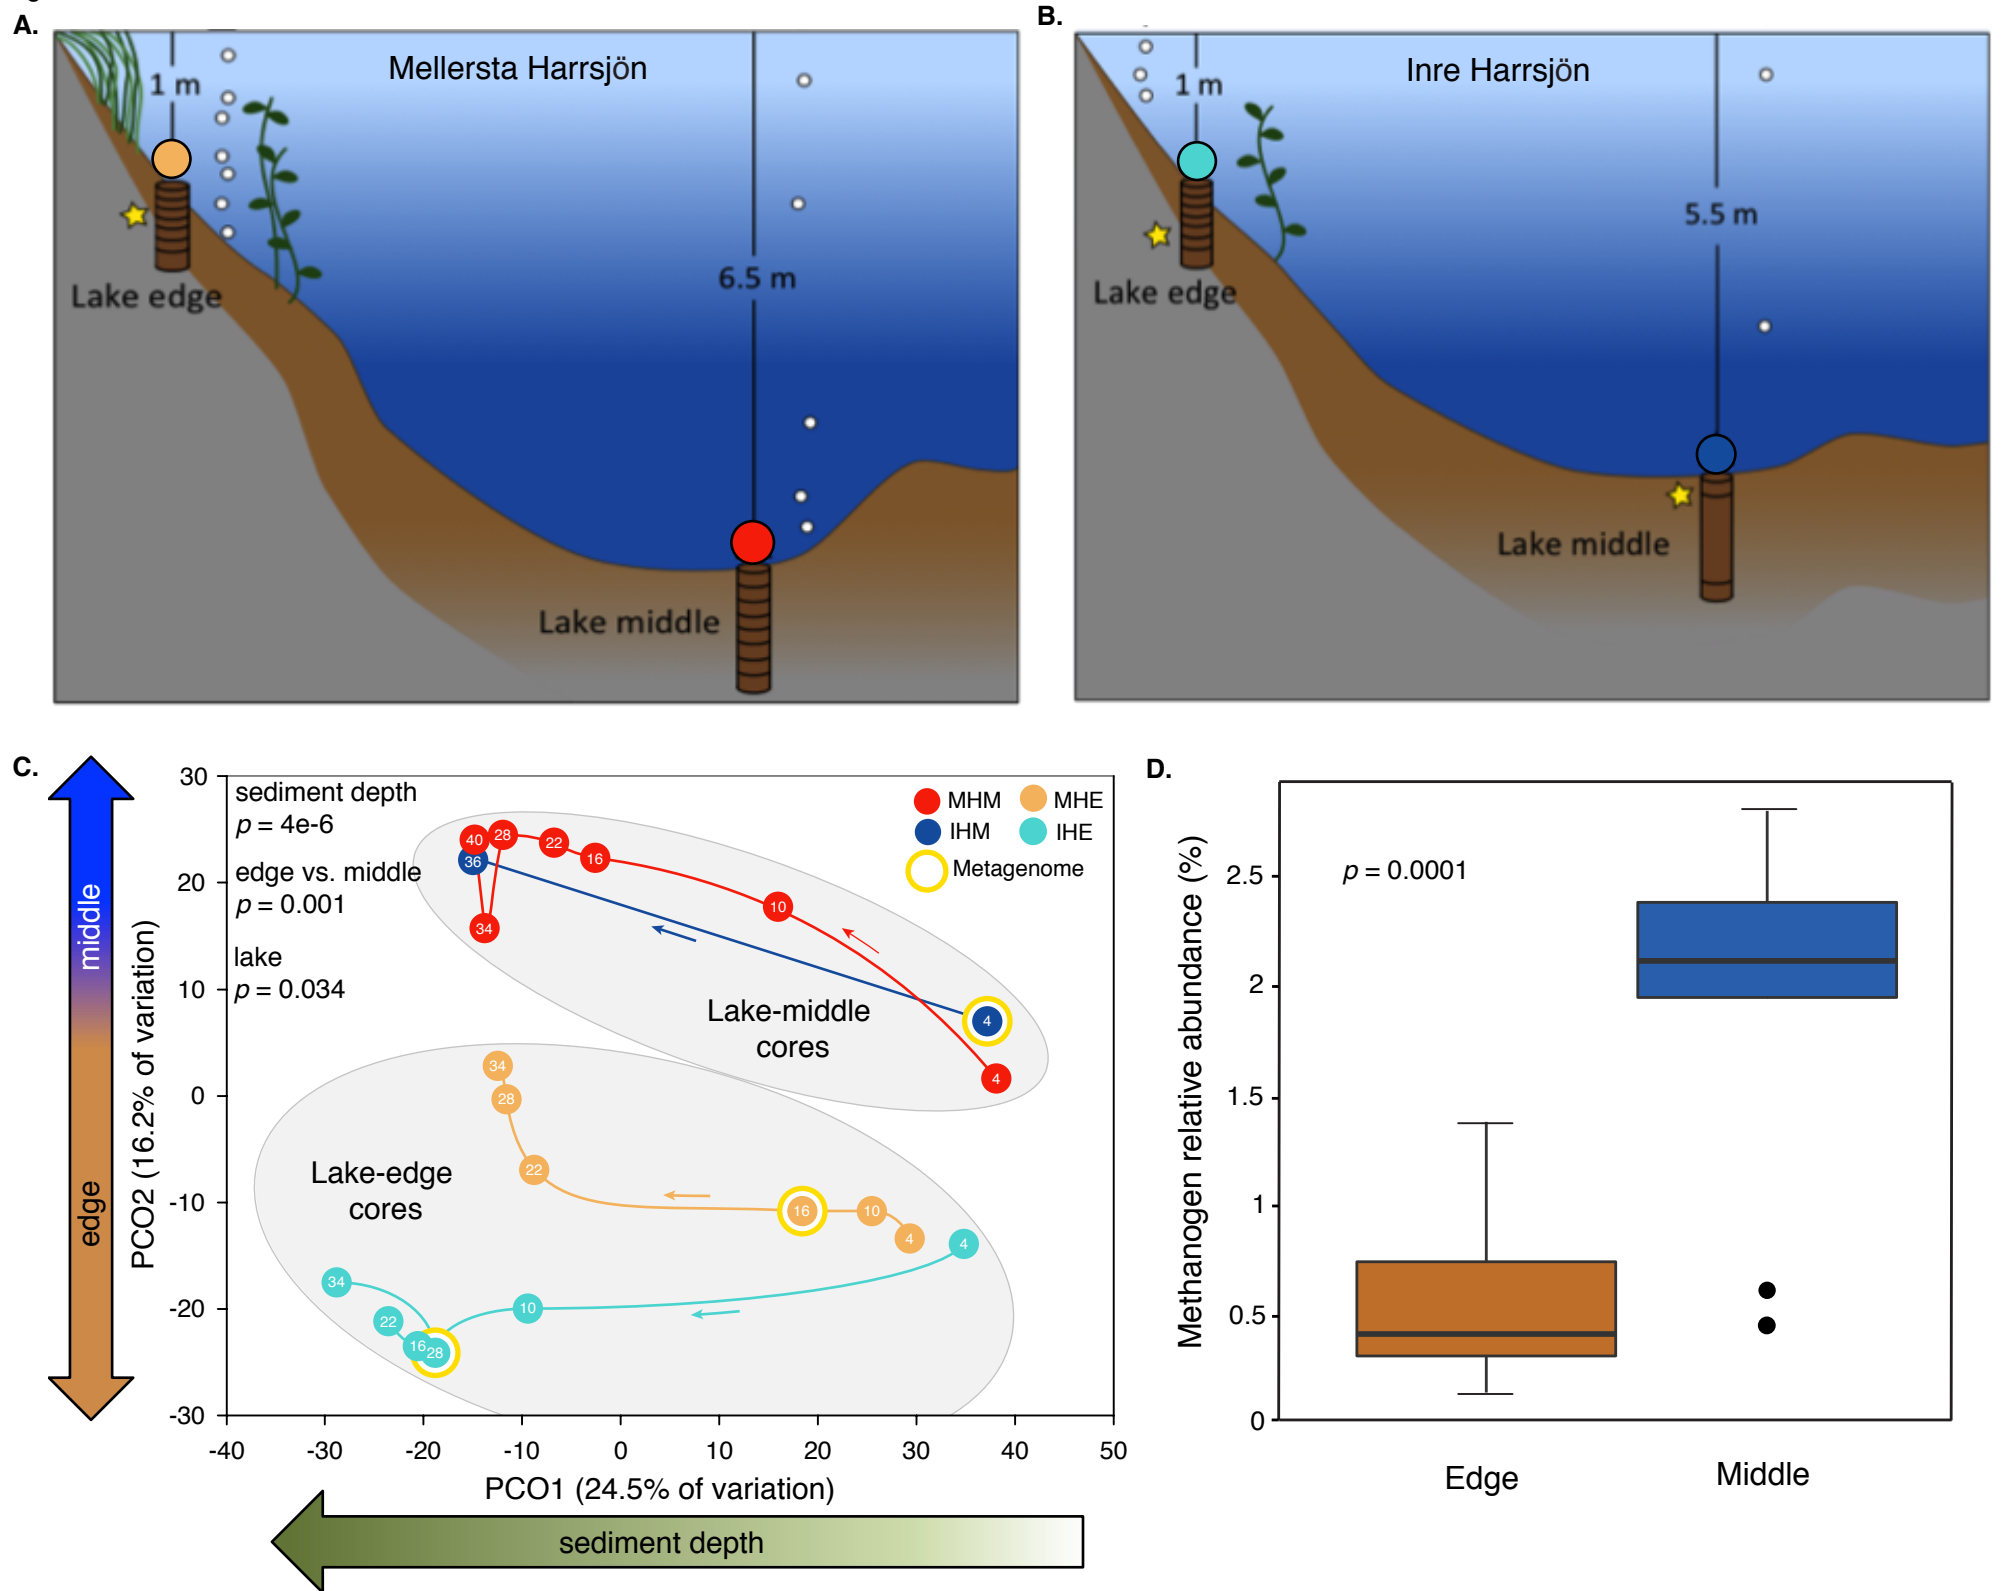

**Figure 2. Lake sediment bacteria and archaea in two post-glacial lakes.** **A, B.** Schematic overview of lakes and cores collected for DNA sequencing analyses, with core subsections indicated by horizontal lines. Cores in each lake are referred to as “Lake edge” or “Lake middle”, with overlying water depth as indicated, and the four colored circles are used to distinguish each core and/or lake location throughout the figures. Yellow stars indicate cores and depths targeted for shotgun metagenomics. **C.** Principal coordinates analysis (PCoA) of microbial community composition across samples (each core subsection,  $n = 21$ ), based on 16S rRNA gene amplicon abundances of microbial operational taxonomic units (OTUs); circles represent samples, and samples in closer proximity have more similar microbial community composition. Thin arrows along colored lines indicate increasing depth within each core. P-values from PERMANOVA indicate how significantly microbial community composition differed according to the indicated categorical variable (significant if  $p < 0.05$ ). **D.** Percent relative abundance of OTUs identified as methanogens in 16S rRNA gene amplicon data in lake edges compared to lake middles (P-value from Student’s T-test, significant if  $p < 0.05$ ).

Figure 3

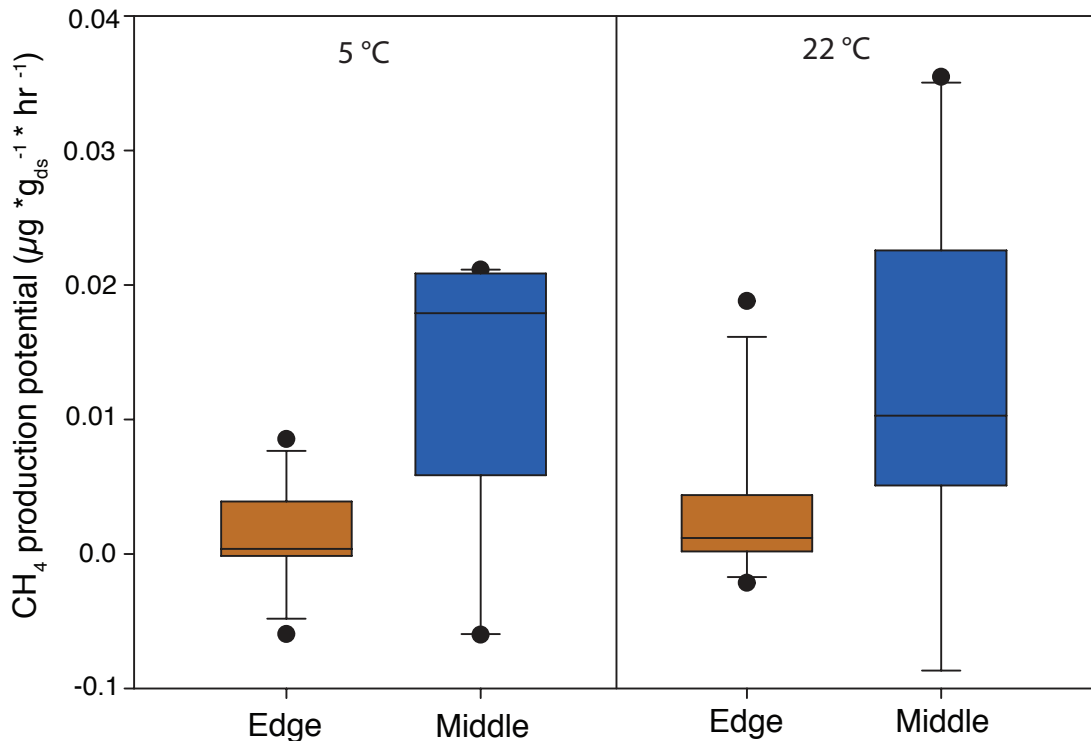

**Figure 3. Methane production from anaerobic laboratory incubations of lake sediments.** Sediments were collected from edges and middles of lakes Inre Harrsjön and Mellersta Harrsjön in 2012 and 2013 (see methods) and incubated at **A.** 5 °C ( $n = 12$ ) and **B.** 22 °C ( $n = 12$ ). Headspace CH<sub>4</sub> concentrations were measured daily for 5 days, and average daily CH<sub>4</sub> fluxes were calculated for each sample. Lines in boxes depict the median, boxes indicate 75th percentile, whiskers 95th percentile, and points are outliers. ds = dry sediment.

Figure 4

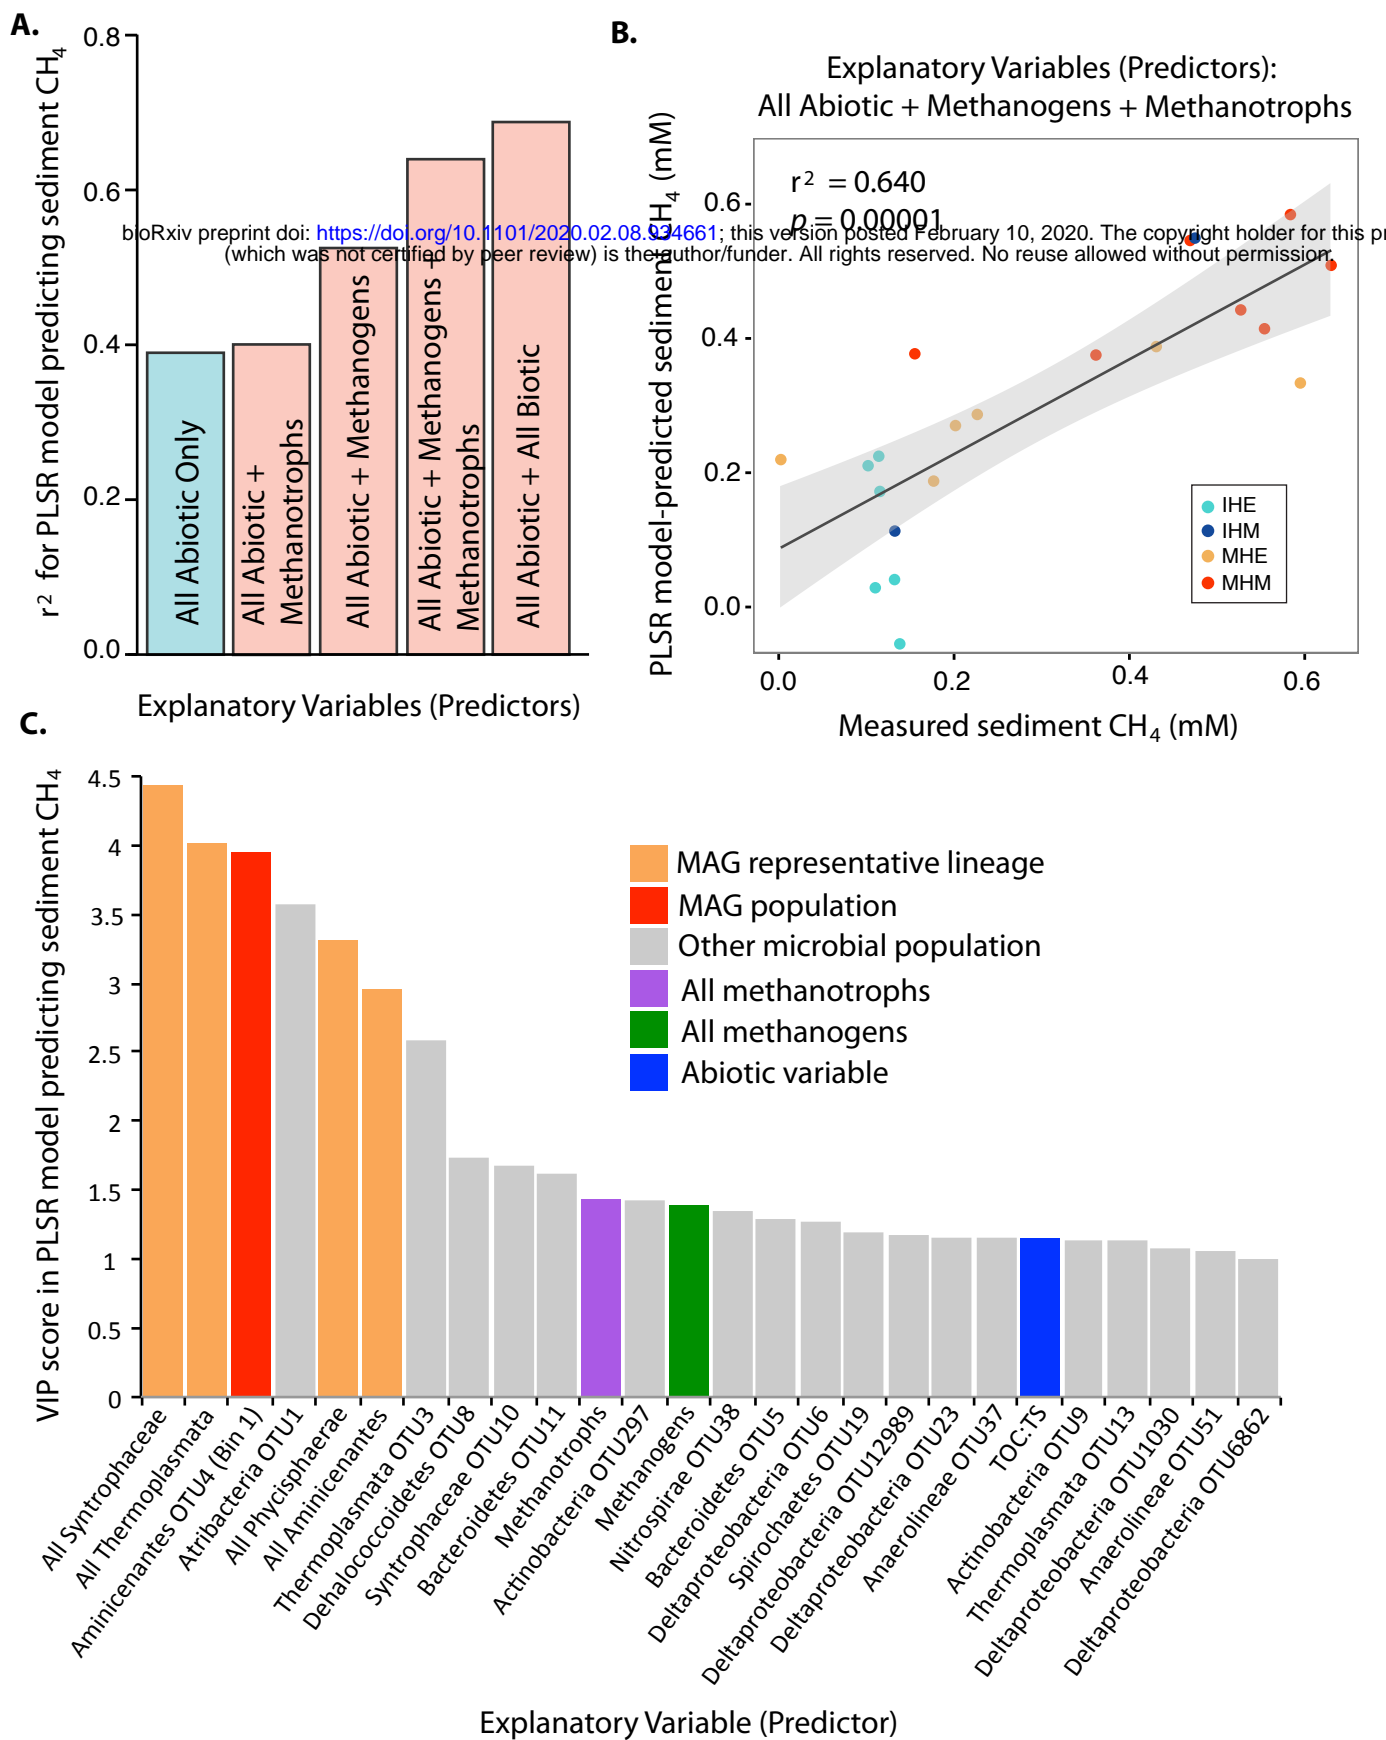

**Figure 4. Partial Least Squares Regression (PLSR) statistical modeling to predict sediment CH<sub>4</sub> concentrations.** PLSR analyses tested the ability of different suites of explanatory variables to predict measured sediment CH<sub>4</sub> concentrations in the four cores from 2012 across depths ( $n = 21$ ); in all models, all measured abiotic variables (except those related to CH<sub>4</sub> concentrations, see methods) were included as explanatory variables, and biotic variables were added as indicated. Biotic variables included relative abundances of specific OTUs and/or summed OTU abundances grouped by taxonomy or predicted metabolism (as indicated), from 16S rRNA gene amplicon data. **A.** Correlation coefficients ( $r^2$ ) for PLSR models predicting sediment CH<sub>4</sub> using different combinations of explanatory variables. **B.** Linear regression of measured and model-predicted sediment CH<sub>4</sub>, considering all abiotic variables and methanogen and methanotroph abundances as explanatory variables; each point is a sample, colored by core. **C.** For the model with the highest  $r^2$  (rightmost in panel A), VIP scores are plotted to indicate the relative contribution of each explanatory variable; a VIP score  $> 1$  is considered significant, and higher VIP scores indicate a more significant contribution to the model; all VIP scores  $> 1$  are shown ( $n = 26$  out of  $n = 153$  total, Supplementary Table 14).
